# Supplementary material
Source: MDPI journal article supplement (https://www.mdpi.com/2073-4433/12/5/526)

# ***Supplementary Materials***

**Title:** Size-segregated atmospheric humic-like substances (HULIS) in Shanghai: abundance, seasonal variation, and source identification

**Authors:** Tianming Sun<sup>1</sup>, Rui Li<sup>1</sup>, Ya Meng<sup>1</sup>, Yu Han<sup>1</sup>, Hanyun Cheng<sup>1</sup>, Hongbo Fu<sup>1, 2, \*</sup>

**Affiliation:**

1 Shanghai Key Laboratory of Atmospheric Pollution and Prevention, Department of Environmental Science and Engineering, Fudan University, Shanghai, China, 200436.

2 Collaborative Innovation Center of Atmospheric Environment and Equipment Technology (CICAEET), Nanjing University of Information Science and Technology, Nanjing, China, 210044.

**\* Corresponding author** fuhb@fudan.edu.cn

Number of pages: 6

Number of figures: 3

Number of tables: 2

**Table S1.** The detailed sampling information including meteorological data and PM concentrations in this study.

| Sample No. | Start date | Terminal Date | Dur. (h) | T (°C) | Weather    | WD        | PM <sub>2.5</sub> (µg/m <sup>3</sup> ) | PM <sub>10</sub> (µg/m <sup>3</sup> ) |
|------------|------------|---------------|----------|--------|------------|-----------|----------------------------------------|---------------------------------------|
| Summer 1   | 2018.6.6   | 2018.6.7      | 24       | 25.5   | Cloudy     | West      | 45                                     | 51                                    |
| Summer 2   | 2018.6.7   | 2018.6.8      | 24       | 25.5   | Cloudy     | Northeast | 26                                     | 31                                    |
| Summer 3   | 2018.6.8   | 2018.6.9      | 24       | 25     | Cloudy     | North     | 23                                     | 29                                    |
| Summer 4   | 2018.6.10  | 2018.6.11     | 24       | 23     | Light Rain | South     | 40                                     | 47                                    |
| Summer 5   | 2018.6.11  | 2018.6.12     | 24       | 26.5   | Cloudy     | East      | 57                                     | 60                                    |
| Autumn 1   | 2018.10.23 | 2018.10.24    | 24       | 19.5   | Sunny      | North     | 56                                     | 57                                    |
| Autumn 2   | 2018.10.24 | 2018.10.25    | 24       | 20     | Cloudy     | East      | 60                                     | 77                                    |
| Autumn 3   | 2018.10.25 | 2018.10.26    | 24       | 19.5   | Light Rain | Southwest | 25                                     | 58                                    |
| Autumn 4   | 2018.10.26 | 2018.10.28    | 48       | 16.5   | Cloudy     | Southwest | 42                                     | 81                                    |
| Winter 1   | 2019.1.7   | 2019.1.8      | 24       | 7      | Light Rain | Northeast | 27                                     | 34                                    |
| Winter 2   | 2019.1.8   | 2019.1.10     | 48       | 5.5    | Overcast   | Southeast | 38                                     | 46                                    |
| Winter 3   | 2019.1.10  | 2019.1.12     | 48       | 7      | Light Rain | North     | 16                                     | 20                                    |
| Winter 4   | 2019.1.12  | 2019.1.13     | 24       | 6      | Light Rain | Northwest | 78                                     | 94                                    |
| Spring 1   | 2019.5.10  | 2019.5.11     | 24       | 21.5   | Overcast   | Northeast | 37                                     | 51                                    |
| Spring 2   | 2019.5.11  | 2019.5.13     | 48       | 23.5   | Cloudy     | Northwest | 38                                     | 56                                    |
| Spring 3   | 2019.5.13  | 2019.5.15     | 48       | 20     | Overcast   | Northeast | 24                                     | 31                                    |
| Spring 4   | 2019.5.15  | 2019.5.17     | 48       | 21     | Overcast   | Southeast | 28                                     | 32                                    |
| Spring 5   | 2019.5.17  | 2019.5.18     | 24       | 22     | Overcast   | Northeast | 32                                     | 33                                    |

**Table S2.** The contribution rates of different species in each possible key source.

|                               | Biomass<br>Combustion | Coal<br>Combustion | Secondary<br>Formation | Vehicle<br>Exhaust |
|-------------------------------|-----------------------|--------------------|------------------------|--------------------|
| Na <sup>+</sup>               | 0.094                 | 0.114              | 0.115                  | 0.269              |
| NH <sub>4</sub> <sup>+</sup>  | 0.043                 | 0.201              | 0.707                  | 0.412              |
| K <sup>+</sup>                | 0.462                 | 0.136              | 0.011                  | 0.131              |
| Ca <sup>2+</sup>              | 0.020                 | 0.051              | 0.087                  | 0.003              |
| F <sup>-</sup>                | 0.002                 | 0.001              | 0.001                  | 0.010              |
| Cl <sup>-</sup>               | 0.045                 | 0.149              | 0.002                  | 0.286              |
| NO <sub>3</sub> <sup>-</sup>  | 0.197                 | 0.352              | 0.103                  | 0.617              |
| SO <sub>4</sub> <sup>2-</sup> | 0.311                 | 0.804              | 0.109                  | 0.270              |
| WSN                           | 0.016                 | 0.060              | 0.293                  | 0.126              |
| OC                            | 0.732                 | 0.340              | 0.227                  | 0.133              |
| EC                            | 0.038                 | 0.010              | 0.139                  | 0.031              |
| WSOC                          | 0.280                 | 0.084              | 0.468                  | 0.374              |
| HULIS                         | 0.147                 | 0.079              | 0.285                  | 0.173              |

**Figure S1.** The map of the sampling site and several characteristic emission point sources nearby.

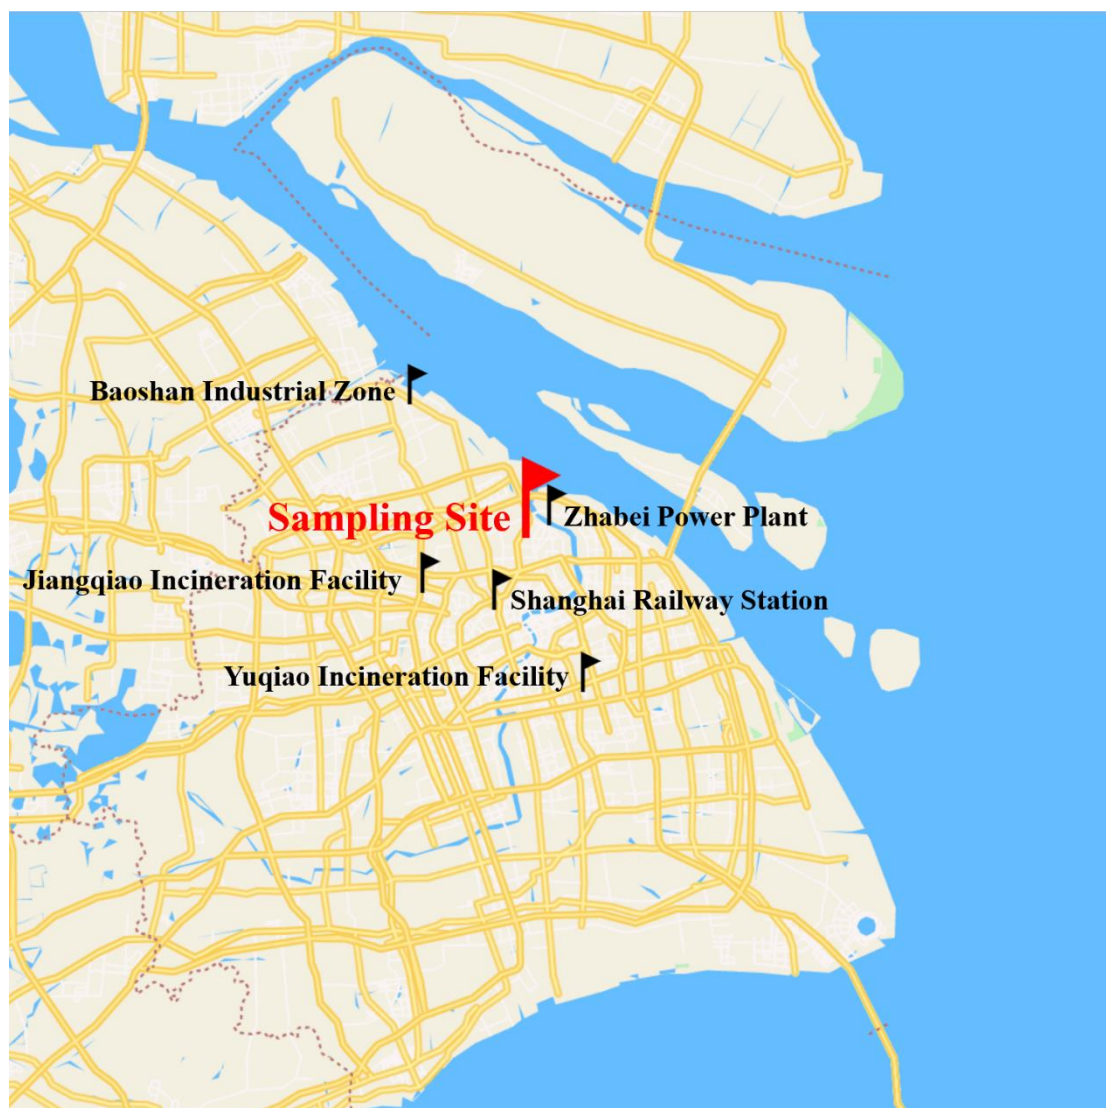

**Figure S2.** Box plots and distribution curves of size distribution of OC (a), EC (b), WSOC (c) and HULIS-C (d) in the aerosol samples through the whole year.

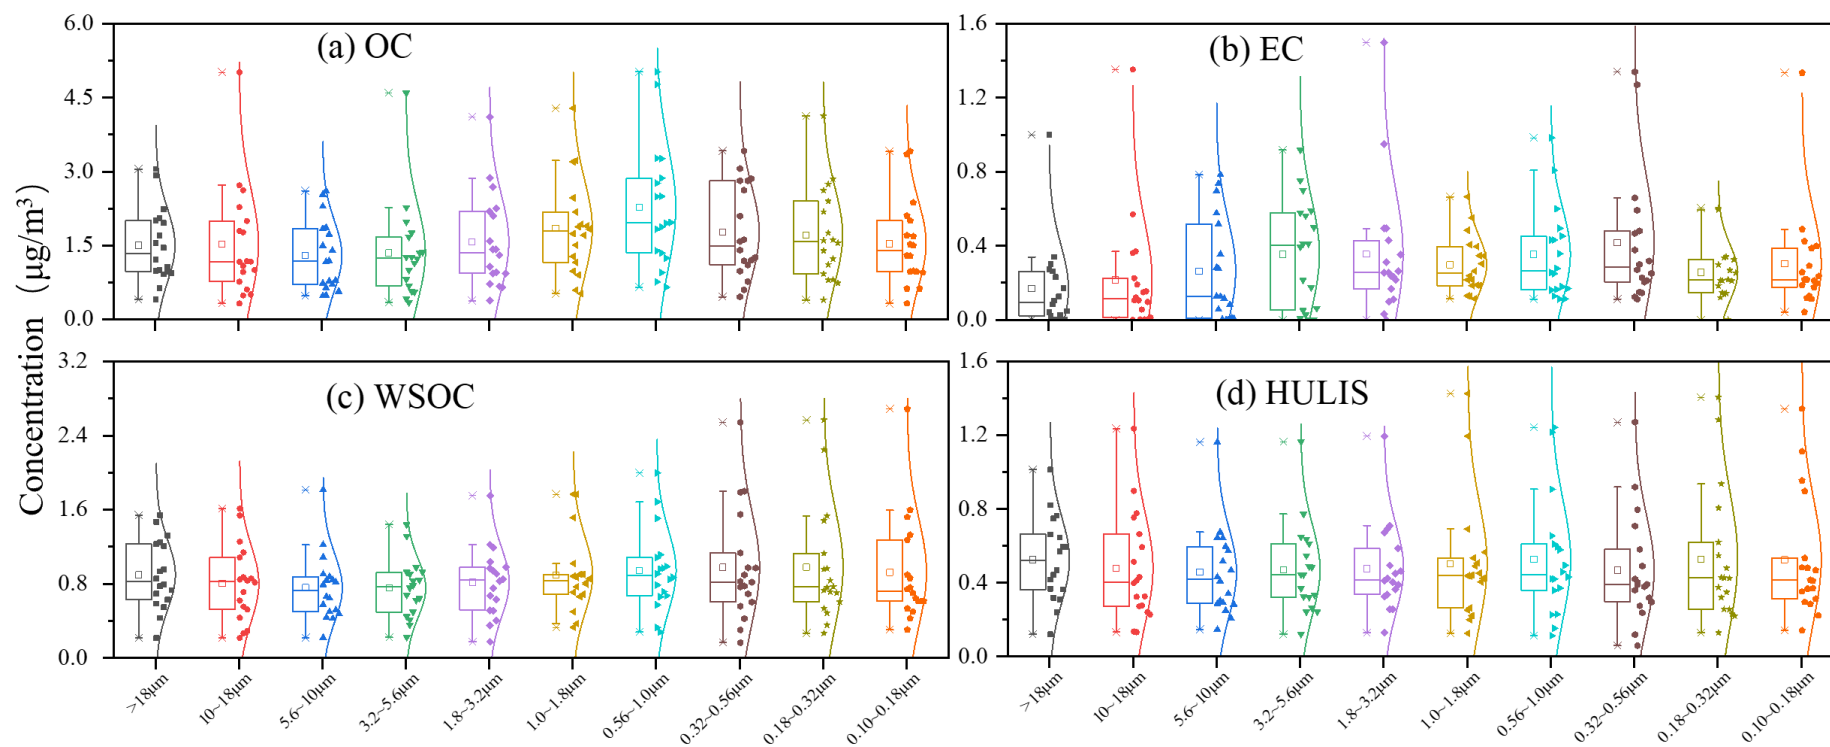

**Figure S3.** Size distribution of mean concentrations of OC (a) and EC (b) in different seasons.

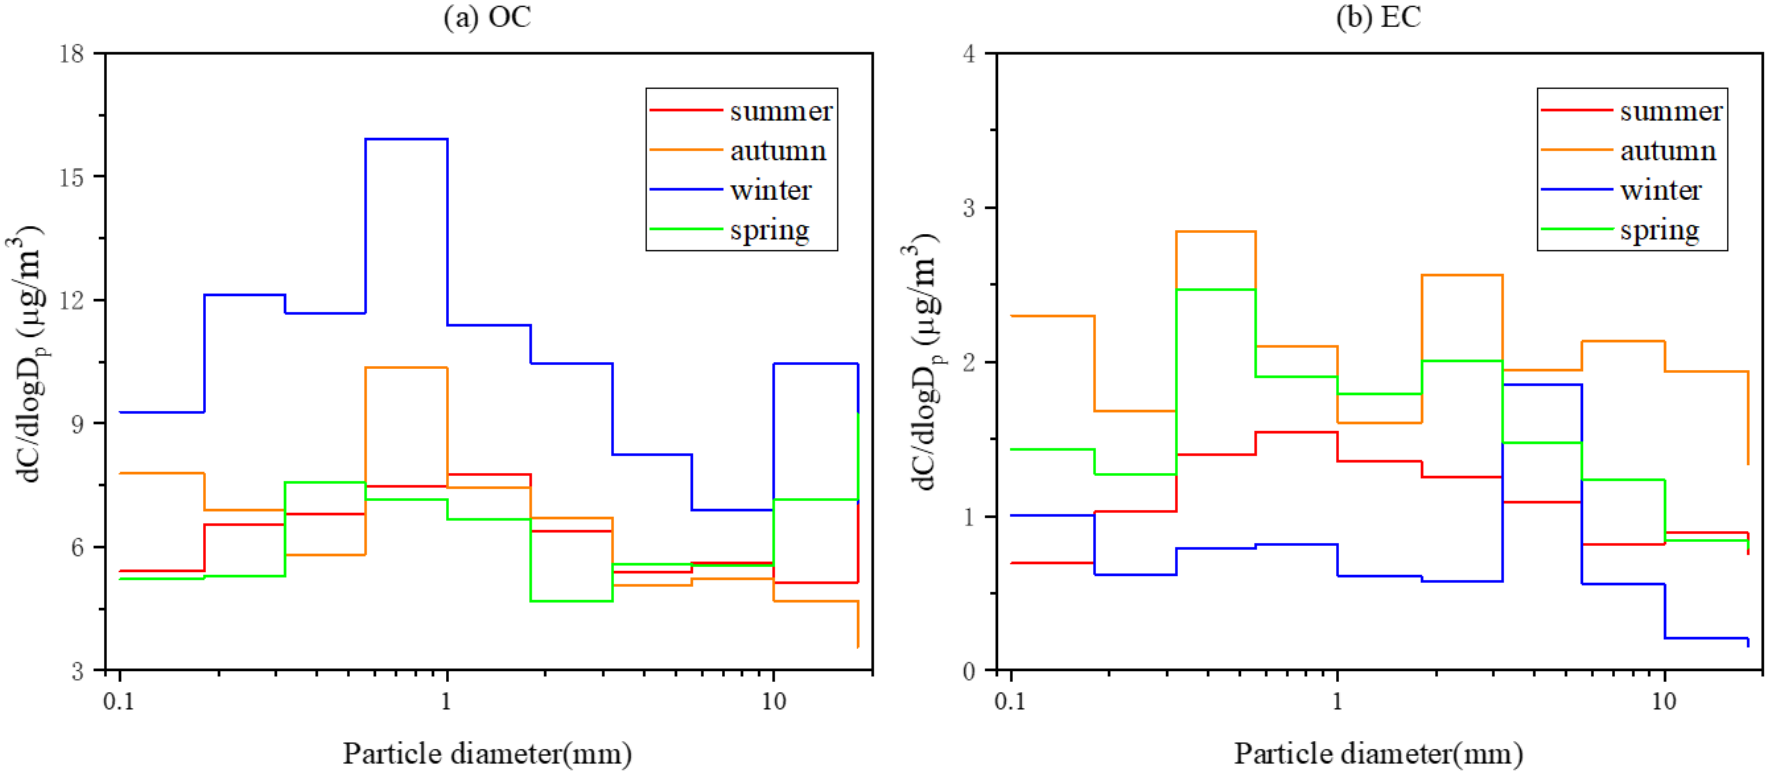

**Figure S4.** The 72-h air mass backward trajectories (AMBTs) at an arrival height of 29 m (a), 500 m (b), and 1,500 m (c) of the sampling site.

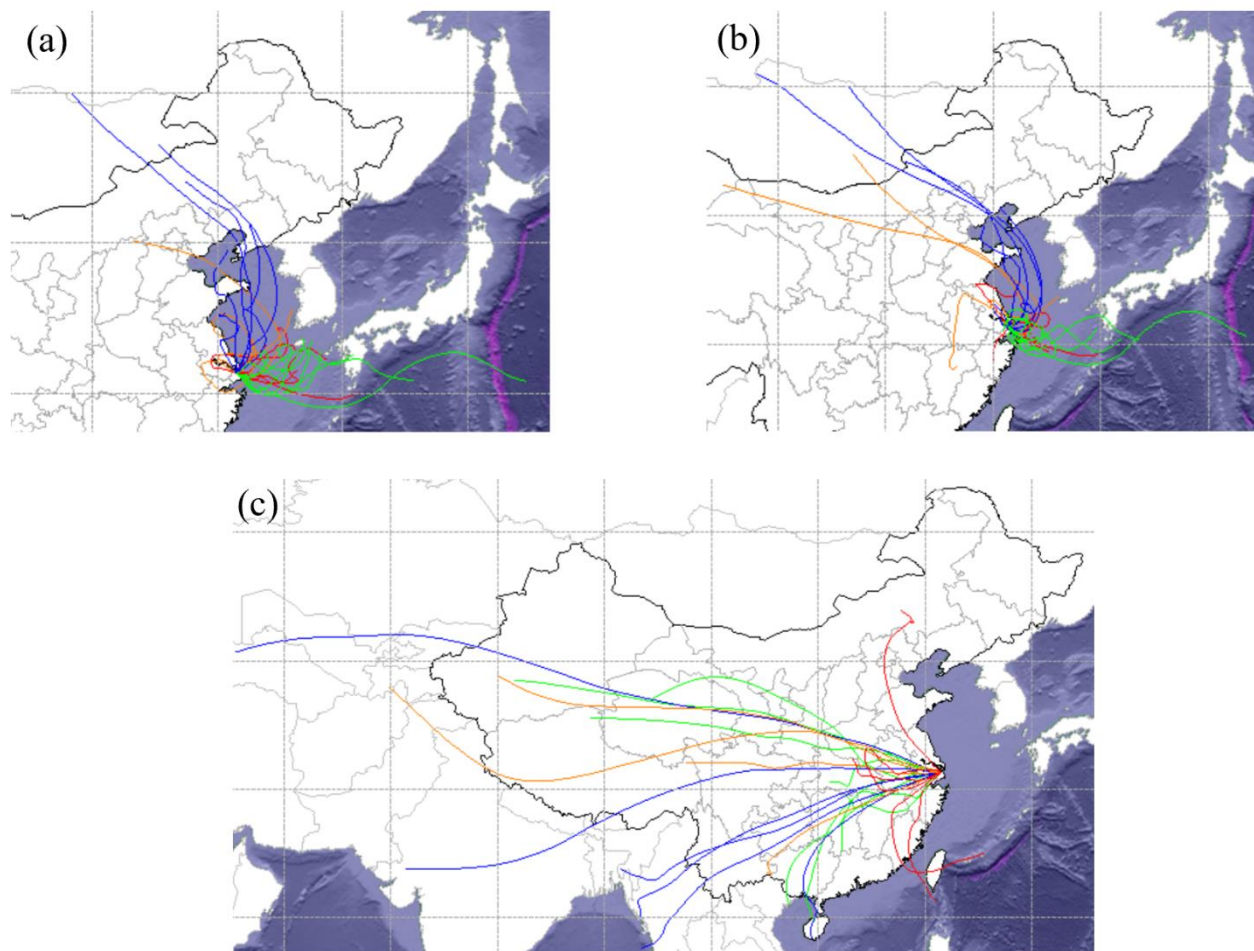

Supplement: s1 [file s1]
